# Supplementary material for: Perceptions of experts on key injury risk factors in alpine ski racing as a function of stakeholder role and associated level of competition
Source: HighWire-hosted journal article supplement (doi:10.1136/bmjsem-2021-001111), 2021-09-01
Supplement: bmjsem-2021-001111supp002_data_supplement.xlsx [file bmjsem-2021-001111supp002_data_supplement.xlsx]

## Sheet: ATHLETE
	ATHLETE
	Risk factor	Mean rank	Mentionings	No of suggested prevention measures	Suggested prevention measures
	Aspects of body temperature	4.05263	19	9	„Adequate warm up “ „Starts with a warm area, like a tent or house. “ „Make sure the tents at the top are big enough and have hot water. Insists on the no smoking in the tents in the Asian countries. “ „Warmer/thicker racingsuits “ „Shower cold-hot “ „When we have -20c extra precautions for speed, snow, terrain need to be made compared to when we are around -5c. “ „Warming up before putting your …
	Athletes’ adaptability	3.26667	60	6	„Atheltes adaptivity: I think that athletes should prepare themselves more for whats ahead and plan better (like training more weeks and harder in summer (drylandtraining) and plan their race calendar better. “ „It's difficult to prevention this fact, because in a race the athletes will do anything to be fast and risking a lot. But sometimes it's just the athletes fault of bad decisions. “ „Links…
	Athletes’ crash behaviour	2.89552	67	7	„Mandatory PPE including helmet, and back brace, and ensure they meet a specific standard “ „Provide some form of training for crash behavior. “ „Learn how to "crash" right “ „Don't crash “ „Learn how to fall “ „Make sure these kids are crashing a lot from a young age while they still bounce. You learn to crash from practicing. “ „Being very ready to crash “
	Athletes’ individual responsibility	2.9375	48	7	„Athletes should all have full responsibility of anything to do with their sport. They should know how to prepare their skis, know how to pack appropriate clothing for the weather, how to eat to a standard that can support their body, and know how to be on time. From personal experience I travel 1hr one way to the resort to train and I am never late, I prepare myself the night before, juggle asse…
	Athlete’s race preparation	2.875	64	14	„To have an objective evaluation simple to use before training or races“ „Be careful when you decide to have a worldcup really soon in the season (like August in New Zealand) the athletes are often not ready for competition because the training opportunities are rare in August. “ „Concentration when preparing “ „Training needs to be individualistic, we have different body structures, some individ…
	Fatigue	2.85333	225	66	„Less traveling around the globe (maybe more races in a row in one country), less races in general (especially for allrounder), more time for regeneration, for testing of material, for adjustment to snow conditions and topography “ „Due the tight race calendar and long travels many athletes are getting tired and loose the focus. Many Athletes need to be prepared better. Physically and mentally.“ …
	Genetics and Anthropometry	3.48649	37	3	„All athletes have different body structures and physiological strengths. Because Alpine Ski Racing is quite an impactful sport, athletes need to be trained in a certain way that supports their body structure. For example: Athletes that have a more stocky and short build won't have the same physiological strengths as that of a thinner and taller athlete and vice versa... Therefore, athletes need …
	Physical aspects	2.92045	176	31	„Better and more focused physical preparation for a long and challenging winter; a very clear definition of the requirements of a physical basis, especially for younger athletes, who come for example to WC for the first time; more EC races with snow conditions, topography and course settings (concerning also the length) similar to WC “ „Setting Physical fitness standards, as prequalification for …
	Psychological aspects	3.23529	85	18	„Less pressure on each athlete “ „It has to be the total volition of the athlete, he/she has to be that professional to ignore confounding factors from others “ „Concentration and focus when you start “ „Take a lot of communication with the athelete. “ „If you can´t focus, stop “ „Mental preparation with sport psychologist or other specialist. Coaches and medical staff should have a couple classe…
	Pre-injury aspects	3.36066	61	13	„Constant gym work, neuromuscular training/ easier access to physios/doctors not all teams can afford one to travel with them. “ „Specific Warm up for each athlete. Injury management + prevention with on snow and off snow medical team. “ „Athletes need to listen to their body and accept the signs they get. We are not a machine where you can constantly replace parts. Listen and take care, because …
	Skiing technique and tactics	3.13008	123	15	„Spec. in Speed Disc. to prevent to be near to the Racing line with B-Nets! They reduce perfect the Speed but Racer is hanging in with Ski+Bdg!! Better New stabel A-Net gives more chances to come out save “ „Adapting technique in variable terrain. “ „It's in athletes responsibility to learn a good technique to be able to perform well and SAFE even under difficult conditions or course settings. “ …

## Sheet: EQUIPMENT
	EQUIPMENT
	Risk factor	Mean rank	Mentionings	No of suggested prevention measures	Suggested prevention measures
	Binding / plate	3.03448	29	3	„Giving high awareness and knowledge about safest way to fit and adjust binding for size and level of athlete “ „A binding should be able to prevent a cruciate ligament tear, so it should open when the shoe pushes too hard up at the front “ „Ski bindings are not very smart. About same technology in the last 20 year or more. “
	Gates (panels and poles)	3.3	20	4	„All Competitions compulsory break away flags (Also need to tear easier) not just in WC Competition. “ „Due diligence paid to the correct use of breakaway gate flags as per the rules by organisers and TD's. Once again no Issue with WC however all levels below suffer from an attention to detail problem. “ „Improve direction change indication system “ „Make an optical system to substitute panels an…
	Protectors and helmets	2.83333	24	3	„Investing in Airbag Development/...maybe thicker speed suits->slower, more protection “ „Develop airbags “ „Air bag systems should be mandatory in speed disciplines “
	Racing suits	3	13	5	„Especially in the speed event, there is a big potential of improvement : I suggest to start a working group together with companies in order to develop new racing suits with following features: - slower textile (able to slow down quicker the speed in case of crash) - integrated standard protectors - integrated airbag - anti-cut material It could be an innovative project, improving athlete's safe…
	Ski	3.08571	35	9	„Make skis wider and back to 27 radius in GS “ „Be attentive to the new thing. Do not push the limit too far “ „We need to create other skies, not that agressive like the skies we have at the moment “ „Degrade the aggressiveness “ „The way how the edge get`s prepaired doesn`t forgive any mistake. Angle base side in combination with the angle sidewal doesn`t give any possibilities to avoid a mista…
	Ski boot	3.16667	6	0	n/a
	System ski, plate, binding, boot	2.79793	193	28	„Less aggressive tuning of ski edges, thicker(softer) liners for ski boots and softer shells, new plates and slightly reduced standing hight. “ „Back to older regulation “ „As i said before the skis are very cool to ski (SL/GS) but you have to be physically strong to be able to stand those forces during the turn. So dont push those limits in ski development especially for the young athletes 16-18…

## Sheet: COURSE
	COURSE
	Risk factor	Mean rank	Mentionings	No of suggested prevention measures	Suggested prevention measures
	Bad visibility	2.99485	194	26	„Same condition for everybody “ „Maybe choose the places to race also by the month. Races in december bormio/santa caterina are at the most darkest time of the year. if the would be in february/march there would be less crashes.. “ „Listen more to athletes opinion on safety “ „Hear on an athletes meaning, more spectacular is not better for the sport “ „Always check the situation while working tog…
	Course maintenance during race	2.78906	128	22	„In my opinion race slop preparations starts to late. Ordinary snow conditions are unsuitable for basic preparation beforehand. I would repead 3/4 times watering before final setup. Instead of injecting water with the bar it`s better to use a pipesytem on the snow cat (38-45l/sec). After grooming the surface will be plain an perfect for racing. Our team uses that kind of conditions arround 50 tim…
	Course setting in general	3.08571	70	19	„Course setters primary focus is on distance and lesser attention paid to surface of snow in the turning zone. Education required for equal focus. This problem primarily relates to all level of races below WC “ „Have more people able to build a good Halfpipe in the world with mentoring program. “ „Setting by FIS, with approval by coaches “ „Discussing with athlete and coaching staff for appropria…
	Jumps	3.73585	53	17	„Reduction of ladies GS ski to 26/27 meter necessary “ „Good prepared jumps “ „Better preparation of athlete and staff of jump “ „Same as my first request: As woman speed coach i'suggest to improve EC Athlete level in general (speed and jumps skills) to be more confident when begin on the WC level. By more training session on a DH race week for top athlete out of the top 40 mixed with EC racers. …
	Level of course difficulty	3.6	45	3	„More safeguards or difficulty rating for athtletes to enter races. Many athletes enter races without thinking the course, location and diffuculty through. A lot of the time it is done out of ease for them not because the race is a fit for them in terms of skill. “ „Also difficult courses and snow conditions has to be trained! “ „Too smooth and easy courses (autopilot courses) do not allow the at…
	Safety net position and spill zone	3.95455	22	2	„Objectively figure out where athletes can end up and with what speed would help making sure we have the net types where needed. “ „Check properly many times. Especially in EC and FIS circuits “
	Speed and course setting aspects	3.08434	83	21	„More tourney courses in gs and sl instead of highspeed an straight lined setting “ „Change the parallel giant slaloms events back to parallel event. Parallel giant slalom events are too dangerous. Imaginge both athletes crashing into each another with ~60-70kmh. Keep it with slalom skis and make an event with the same rules for some years now. “ „Look into the science and test courses at low ris…
	Speed and topographic aspects	3.2619	42	1	„Ensure appropriate time for courses to be built and tested prior to competition “
	Speed in general	3.48276	29	6	„Reduce speed by course setting “ „Example: the 'alte schneise' until seidlalm is for the racer very difficult to not crash. same on haneggschuss. the camel jumps in gröden is for the racer not very difficult, for the public it is one of the best place to view because they can see the athlete moving! alte schneise: 120kmh, haneggschuss >140kmh camel jumps: <80kmh. i mean its not always the speed …
	Topography in general	3.71429	7	0	n/a

## Sheet: SNOW
	SNOW
	Risk factor	Mean rank	Mentionings	No of suggested prevention measures	Suggested prevention measures
	Aggressive snow conditions	2.87402	127	10	„Better management of snow/ air temperatures and slope preparation. Over water injection creating too aggressive conditions. “ „For me the preparation for the slopes is not good sometimes, also we need to work for having all the time good warm up with the same preparation to the race hill “ „Reduce the hight if the boots “ „To avoid aggressive snow conditions & icy hard conditions are much less d…
	Changing snow conditions	2.53416	322	47	„The rules of the safe snow conditions should be more strict and indeed more respected. FIS priority should be on athletes. I think FIS should organise seminars and courses for people who are working on slope conditions during the races. Also, depending on the discipline, more people in working groups should be requested by FIS Techical delegates. “ „Use of airbag and knee braces “ „Athletes is t…
	Smooth snow surface	2.80488	82	6	„Races on soft snow are in my eyes more dangerous than on ice. Thats because the skis can get stuck and take another direction. “ „Use more often water to prepare hard courses and adapt course setting “ „Not to ski, when its dangerous for the high numbers “ „Considering outdoor sport, and not easy to prepare the race course, in any case the hard base condition is always safe “ „Making sure that e…
	Techniques of snow preparation	3.07752	129	21	„More education for organisers of races at all levels “ „There should be a group of experienced people that would prepare world cup slope. “ „A professionnal Team should be hired to prepare all WC slopes “ „The peparation of course is often at too low level, water to make the courses harder must be taken into serious consideration. Often the Females get soft courses and Male hard courses. “ „Snow…
				.

## Sheet: ADDITIONAL RISK FACTORS
	ATHLETE
	Risk factor	Importance	No of suggested prevention measures	Suggested prevention measures
	Medication	High	0	n/a
	EQUIPMENT
	Risk factor	Importance	No of suggested prevention measures	Suggested prevention measures
	Ski - Ski edge tuning	High High	2	„Control approval of machines and require de-tuning (moderating) mechanism“ „Maybe not at the WC level where factories are preparing skis, but at the club level where athletes are using edge machines to tune their own skis this is a problem. They are making their skis too sharp and too aggressive and this is leading to more crashes and more injuries having to do with being cut by the edges.“
	COURSE
	Risk factor	Importance	No of suggested prevention measures	Suggested prevention measures
	Environmental influences	Moderate Moderate High	0	n/a
	Forced Jury decisions	Moderate Moderate High High	3	„The jury must be able to prioritize safety aspects in front of race delivery pressure also get more possibilities for corrections during race time based on changing conditions.“ „After certain gust speed - cancel or post one comp. “ „It is an outdoor sport, so we will lose races, sometime we need to be ok with trying our best and still losing races. The athletes are the biggest asset that FIS ha…
	Lacking athlete-/stakeholder voice	Moderate High	2	„Listen to the athlets and coaches.“ „Discussion before with all the actors“
	Level differences	High	0	n/a
	Parallel events	Moderate High	2	„No more parallel GS events. Slalom works...GS too dangerous...a lot of injuries last season.“ „Stop GS parallel Only SL With wider space in between And larger finish area“
	Race organisation	Moderate Moderate High	1	„Many races where Female and Male races compete on the same course if conditions are marginal they allow the females to race and cancel the mens race. This mentality needs to stop for the safety of all athletes. If the conditions are not appropriate for the men it is equally not appropriate for the women.“
	Warm up slopes	Low	0	n/a
	SNOW
	Risk factor	Importance	No of suggested prevention measures	Suggested prevention measures
	n/a	n/a	n/a	n/a
